# Supplementary material
Source: PubMed Central journal article supplement (PMC8884142)
Supplement: Supp_TableS1.pdf [file Supp_TableS1.pdf]

SUPPLEMENTARY TABLE S1. REPRESENTATIVE PICTURES OF MORPHOLOGY FOR EACH SPHEROID GROUP

|         | <i>Dispersed</i>                                                                  | <i>Clumped</i>                                                                     | <i>Clustered</i>                                                                    |
|---------|-----------------------------------------------------------------------------------|------------------------------------------------------------------------------------|-------------------------------------------------------------------------------------|
| Group 1 | 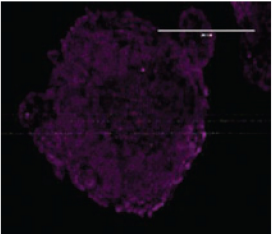 |  | n/a                                                                                 |
| Group 2 |  |  |  |
| Group 3 |  |  |  |

CD31 staining of Groups 1, 2, and 3 spheroids. *Purple* = CD31-positive cells. Scale bar 200  $\mu\text{m}$ .

n/a, not applicable.
